# Supplementary material for: miR-302a Inhibits Metastasis and Cetuximab Resistance in Colorectal Cancer by Targeting NFIB and CD44
Source: PubMed Central journal article supplement (PMC6857048; doi:10.7150/thno.36605), 2019-10-22
Supplement: thnov09p8409s1.pdf [file thnov09p8409s1.pdf]

## Supplementary Figures

### Figure S1

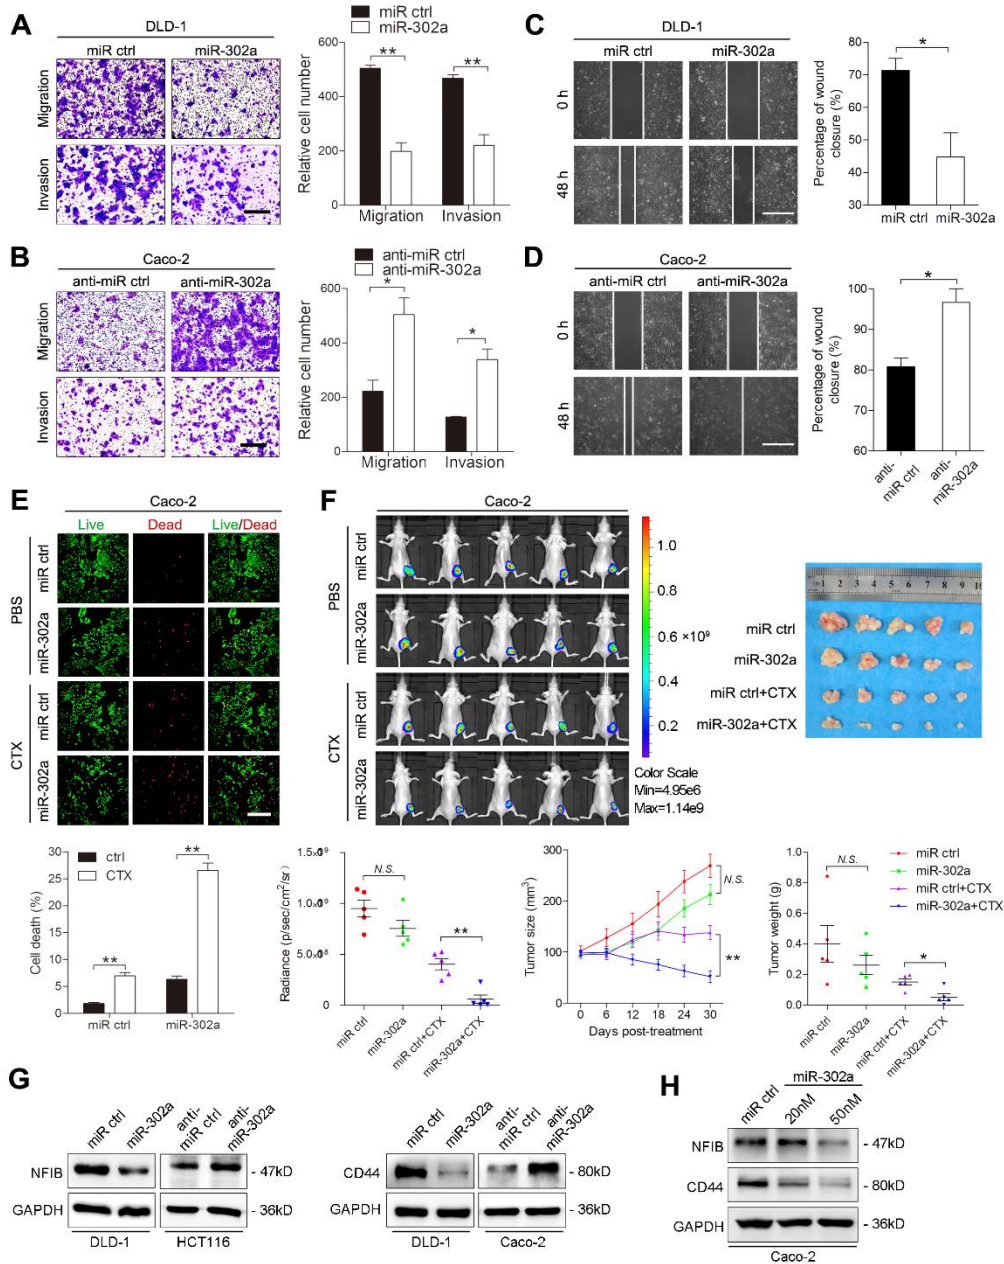

**Figure S1 miR-302a inhibits migration and invasion *in vitro* and restores CTX responsiveness *in vivo* by targeting NFIB and CD44.** **A, B** Representative images and graph of up- and downregulation of miR-302a in DLD-1 (A) and Caco-2 (B) cells, as determined by Transwell migration and invasion assays. Scale bar, 500  $\mu$ m. **C, D** Representative images and graph of up- and downregulation of miR-302a in DLD-1 (C) and Caco-2 (D) cells, as determined by wound-healing assay. Scale bar, 500  $\mu$ m. **E** Representative images of Caco-2 cells after fluorescence staining for LIVE/DEAD cell viability assay. Green: active esterase in the cytoplasm stained with calcein AM (live cells); red: damaged cell membrane allows ethidium homodimer to bind to DNA (dead cells). Images were acquired 72 h after CTX treatment. Scale bar, 500  $\mu$ m. **F** Bioluminescent images, anatomical photos of tumors, and graph of tumor weights and volumes of xenografts treated with CTX from mice implanted with control or miR-302a-overexpressing Caco-2 cells (n=5). **G, H** Western blot analysis of NFIB and CD44 expression with miR-302a up- and downregulation in the indicated cells. The values represent the mean  $\pm$  SEM. \* $P$ <0.05, \*\* $P$ <0.01, *N.S.*, not significant.

**Figure S2**

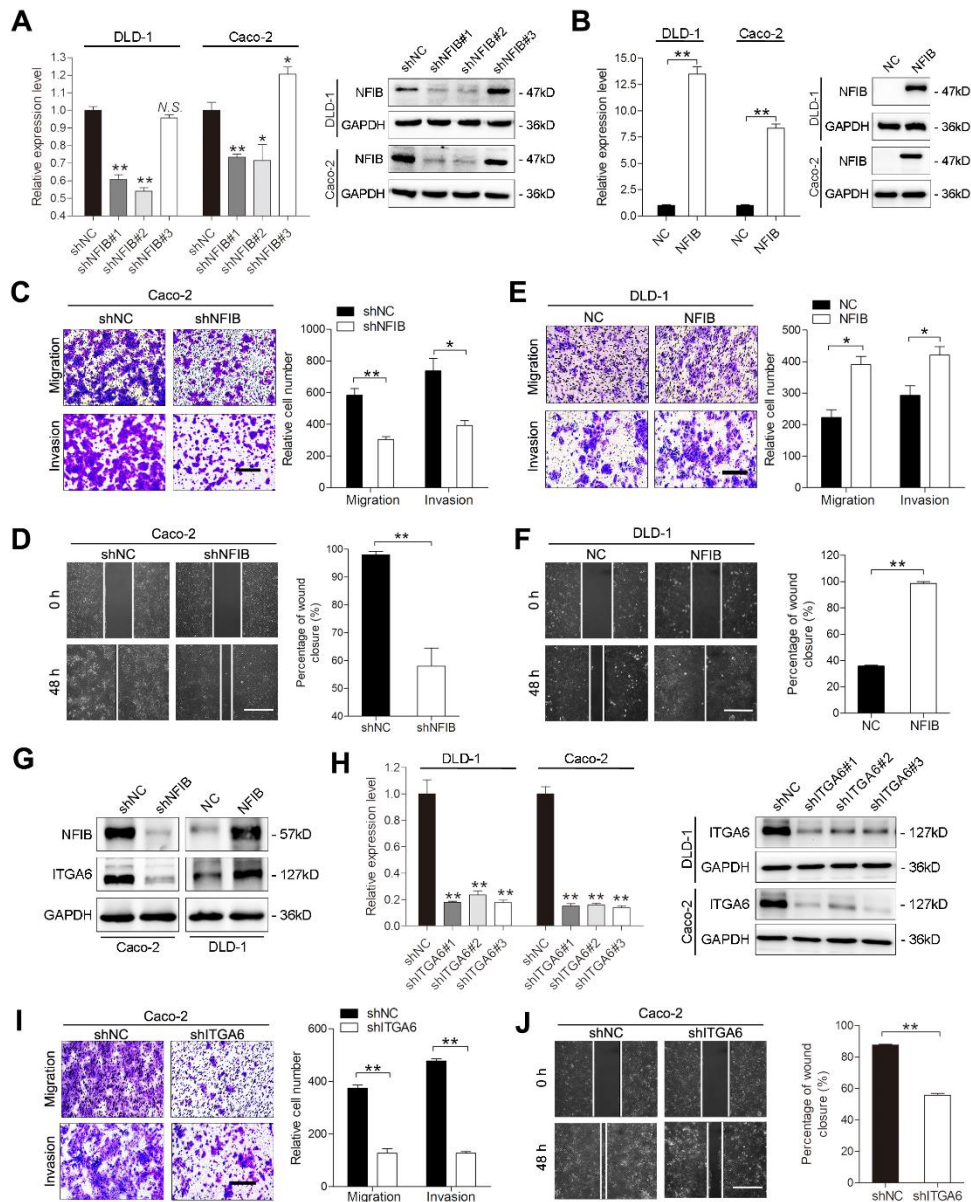

**Figure S2 NFIB and ITGA6 promotes the migration and invasion of CRC cells.** **A** qPCR and Western blot analyses of NFIB expression in DLD-1 and Caco-2 cells infected with a specific shRNA for NFIB (shNFIB) or a negative control (shNC). **B** qPCR and Western blot analyses of NFIB expression in DLD-1 and Caco-2 cells infected with lentiviral NFIB or a negative control (NC). **C, D** Representative images and graph of NFIB up- or downregulation in Caco-2 cells, as determined by Transwell migration and invasion assays (C) and wound-healing assay (D). Scale bar, 500  $\mu$ m. **E, F** Representative images and graph of NFIB up- or downregulation in DLD-1 cells, as determined by Transwell migration and invasion assays (E) and wound-healing assay (F). Scale bar, 500  $\mu$ m. **G** Western blot analyses of ITGA6 expression with NFIB down- and upregulation in Caco-2 and DLD-1 cells. **H** qPCR and Western blot analyses of ITGA6 expression in DLD and Caco-2 cells infected with a specific shRNA for ITGA6 (shITGA6) or a negative control (shNC). **I, J** Representative images and graph of ITGA6 up- or downregulation in Caco-2 cells, as determined by Transwell migration and invasion assays (I) and wound-healing assay (J). Scale bar, 500  $\mu$ m. The values represent the mean  $\pm$  SEM. \* $P$ <0.05, \*\* $P$ <0.01, *N.S.*, not significant.

**Figure S3**

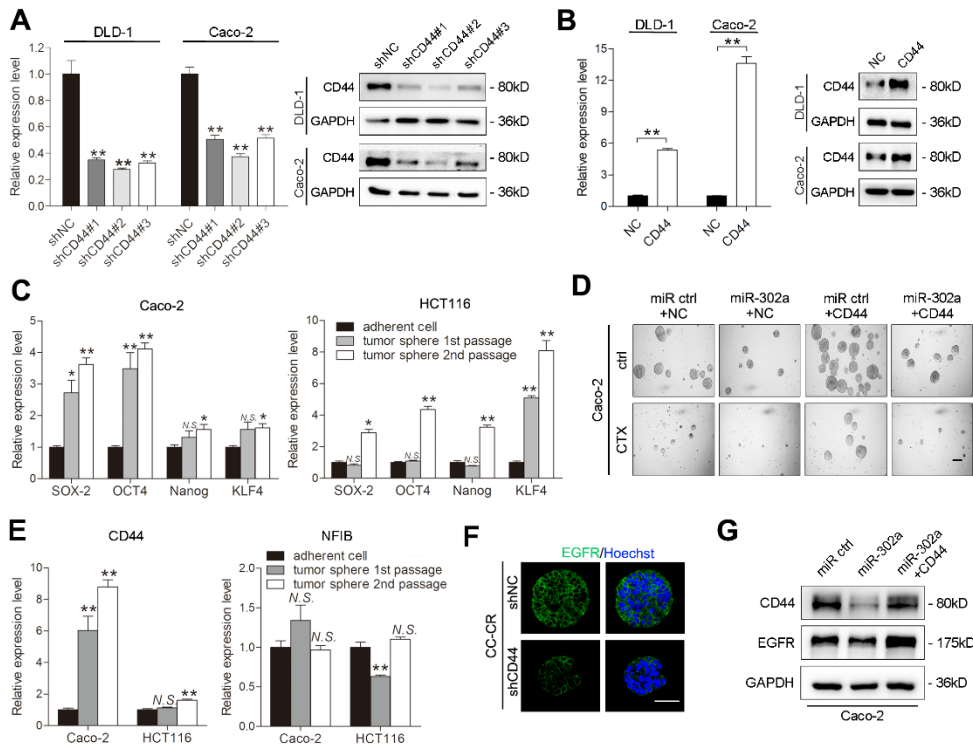

**Figure S3 miR-302a suppresses CSC-like characteristics and EGFR expression in CTX treatment by suppressing CD44 in CRC cells.** **A** qPCR and Western blot analyses of CD44 expression in DLD-1 and Caco-2 cells infected with a specific shRNA for CD44 (shCD44) or a negative control (shNC). **B** qPCR and Western blot analyses of CD44 expression in DLD-1 and Caco-2 cells infected with lentiviral CD44 or a negative control (NC). **C** qPCR analyses of SOX-2, OCT4, Nanog and KLF4 expression in the indicated cells. **D** Representative micrographs of tumor spheres formed when transfected with miR-302a and/or CD44 in Caco-2 cells in the presence or absence of CTX (100  $\mu\text{g}/\text{ml}$ ). Scale bar, 200  $\mu\text{m}$ . **E** qPCR analyses of CD44 and NFIB expression in the indicated cells. **F** Representative immunofluorescence images of EGFR staining with CD44 downregulation in CC-CR cells in a 3D culture system. Scale bar, 50  $\mu\text{m}$ . **G** Western blot analyses of CD44 and EGFR expression when transfected with miR-302a and/or CD44 in Caco-2 cells. The values represent the mean  $\pm$  SEM. \* $P < 0.05$ , \*\* $P < 0.01$ , N.S., not significant.

**Figure S4**

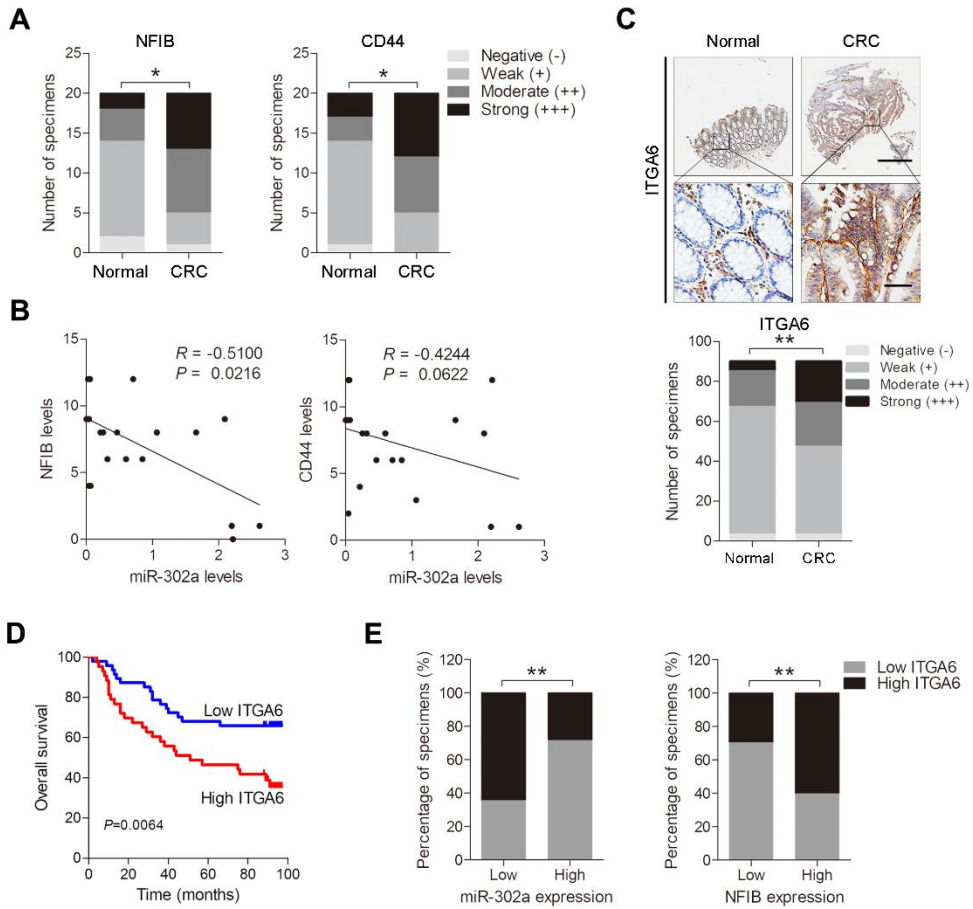

**Figure S4 Expression of miR-302a, NFIB, CD44 and ITGA6 in human CRC tissues. A** Analysis of IHC staining of NFIB and CD44 in 20 paired human CRC specimens and their adjacent normal tissues. **B** Correlations between miR-302a and NFIB or CD44 levels in the 20 paired human CRC specimens and their adjacent normal tissues. Significance determined by Spearman correlation. **C** Representative images and analysis of IHC staining for ITGA6 expression in 90 paired CRC specimens and their adjacent normal tissues. Scale bar, 500  $\mu\text{m}$  (top) and 50  $\mu\text{m}$  (bottom). **D** Kaplan–Meier analysis of overall survival of CRC patients according to high or low ITGA6 expression. **E** Associations between ITGA6 and miR-302a or NFIB levels in the 90 paired CRC specimens. \* $P < 0.05$ , \*\* $P < 0.01$ .

**Supplementary Table 1 Origin and genetic information of cell lines used in this study**

| <b>Cell line</b> | <b>Disease</b>                 | <b>Tissue</b>                                | <b>Mutational status</b> |
|------------------|--------------------------------|----------------------------------------------|--------------------------|
| HIEC             | Normal                         | Small intestine                              | WT                       |
| HCT116           | Colorectal carcinoma           | Colon                                        | KRAS                     |
| DiFi             | Familial adenomatous polyposis | Rectum                                       | WT                       |
| HCT8             | Colorectal adenocarcinoma      | Ileocecal colon                              | KRAS                     |
| HT29             | Colorectal adenocarcinoma      | Colon                                        | BRAF                     |
| LoVo             | Colorectal adenocarcinoma      | Metastatic site: left supraclavicular region | KRAS                     |
| RKO              | Colorectal carcinoma           | Colon                                        | BRAF                     |
| DLD-1            | Colorectal carcinoma           | Colon                                        | KRAS                     |
| SW620            | Colorectal adenocarcinoma      | Metastatic site: lymph node                  | KRAS                     |
| SW480            | Colorectal adenocarcinoma      | Colon                                        | KRAS                     |
| Caco-2           | Colorectal adenocarcinoma      | Colon                                        | WT                       |
| SW1463           | Colorectal adenocarcinoma      | Rectum                                       | KRAS                     |
| T84              | Colorectal carcinoma           | Metastatic site: lung                        | KRAS                     |
| SW948            | Colorectal adenocarcinoma      | Colon                                        | KRAS                     |

Mutational status refers to the status of KRAS and BRAF genes.

**Supplementary Table 3 shRNA sequence used in this study**

| shRNA     | Sense (5' to 3')              | Antisense (5' to 3')          |
|-----------|-------------------------------|-------------------------------|
| shNC      | UUCUCCGAACGUGUCACGUTT         | ACGUGACACGUUCGGAGAATT         |
| shNFIB#1  | GAUGUAUUCUCCCAUCUGUTT         | ACAGAUGGGAGAAUACAUCTT         |
| shNFIB#2  | GGAGUUGCACACAGUGUCAUCUC<br>AA | UUGAGAUGACACUGUGUGCAACU<br>CC |
| shNFIB#3  | CCUCCUACAUCAGCAACATT          | UGUUGCUGAUGUAGGAAGGTT         |
| shITGA6#1 | GGUGGCAAGAUUAUAGUUAUTT        | AUAACUAUAUCUUGCCACCTT         |
| shITGA6#2 | CAGGUUCUCAAGGGUAUAUTT         | AUAUACCCUUGAGAACCUGTT         |
| shITGA6#3 | GGCCUGUGAUUAAUAUUCATT         | UGAAUAUUAUUCACAGGCCTT         |
| shCD44#1  | CUCCAGUAUGACACAUAUTT          | AUAUGUGUCAUACUGGGAGTT         |
| shCD44#2  | GGACCAAUUACCAUAACUATT         | UAGUUAUGGUAUUUGGUCCTT         |
| shCD44#3  | GCAGUCAACAGUCGAAGAATT         | UUCUUCGACUGUUGACUGCTT         |

**Supplementary Table 4 Primers used in this study**

| <b>Primer</b>                                   | <b>Forward sequence (5' to 3')</b>                             | <b>Reverse sequence (5' to 3')</b>                             |
|-------------------------------------------------|----------------------------------------------------------------|----------------------------------------------------------------|
| GAPDH                                           | GCACCGTCAAGGCTGAGAAC                                           | TGGTGAAGACGCCAGTGGA                                            |
| NFIB                                            | CTTATCCAATCCCGACCAGA                                           | GACTAGATCCAGACGCCAGACT                                         |
| ITGA6                                           | TTGTTGGCGAGCAAGCTATGA                                          | TTGCTGTGCCGAGGTTTGTA                                           |
| CD44                                            | GCATTGCAGTCAACAGTCGAAGA                                        | CCTTGTTACCAAATGCACCA                                           |
| EGFR                                            | TGATAGACGCAGATAGTCGCC                                          | TCAGGGC ACGGTAGAAGTTG                                          |
| SOX-2                                           | CCAAGATGCACAACCTCGGAGA                                         | CCGGTATTTATAATCCGGGTGCT                                        |
| OCT4                                            | GTGCCGTGAAGCTGGAGAA                                            | TGGTCGTTTGGCTGAATACCTT                                         |
| Nanog                                           | CCTGTGATTTGTGGGCCTGA                                           | CTCTGCAGAAGTGGGTTGTTTG                                         |
| KLF4                                            | AAGAGTTCCCATCTCAAGGCACA                                        | GGGCGAATTTCCATCCACAG                                           |
| Epcam                                           | AAGGACACTGAAATAACCTGCTCTG                                      | TTGATAACGCGTTGTGATCTCC                                         |
| CD133                                           | AGTGGCATCGTGCAAACCTG                                           | CTCCGAATCCATTCGACGATA                                          |
| CD166                                           | CATTATCATACTTGCCGACTTG                                         | TGTATTCTGGTACATCGTCGTA                                         |
| NFIB miR-302a binding site 1 mutagenesis primer | AAGAAGATAATAGACCAGCAATTGCCATCTGGCCA<br>ATCACTAATCCCTTAAGGTTGA  | TCAACCTTAAGGGAATTAGTGATTGGCCAGATGG<br>CAATTGCTGGTCTATTATCTTCTT |
| NFIB miR-302a binding site 2 mutagenesis primer | AGAAAAATAAAATTAATGAAAACACCATCTGGCTG<br>TTGGTTTAGCTGCAGCCTCCTTG | CAAGGAGGCTGCAGCTAAACCAACAGCCAGATG<br>GTGTTTTCATTAATTTTATTTTCT  |

|                                               |                                                                  |                                                                     |
|-----------------------------------------------|------------------------------------------------------------------|---------------------------------------------------------------------|
| CD44 miR-302a binding site mutagenesis primer | GCTGAGTTGAACATCTGGATTGGAAAATATTA<br>GGCTAACATTAAGACTAAAGGAAACAGA | TCTGTTTCCTTTAGTCTTTTAATGTTAGCCTTTAA<br>TATTTCCAATCCAGATGTTCAACTCAGC |
| ITGA6 ChIP1 primer                            | ATAGTTAACAGCTGGTGTGAC                                            | TCCAAAGTGGGGTGCAGTGG                                                |
| ITGA6 ChIP2 primer                            | GCTCCTGCTCTTTCCTGGGGC                                            | TGGTTTTTCAGCAGCCTGCCAA                                              |
| ITGA6 ChIP3 primer                            | CTAAATGTCAGAGGTTGGTG                                             | CGATGCCGTTCTTTCCTAGCC                                               |
| ITGA6 ChIP4 primer                            | TAGGTGATCTGGGGACAAGGC                                            | AGATGTGGGCCCACGTGCAG                                                |
| ITGA6 ChIP control primer                     | TAGGCCAGGGGAGGTGGCTC                                             | TACAGGCACATGCCACCATGC                                               |

---



**Supplementary Table 5 Primary antibodies used in this study**

| <b>Antibody</b>   | <b>Company</b>               | <b>Catalog No.</b> | <b>Application</b> | <b>Dilution</b> |
|-------------------|------------------------------|--------------------|--------------------|-----------------|
| GAPDH             | Proteintech                  | 10494-1-AP         | Western blot       | 1:2,000         |
| NFIB              | Abcam                        | ab186738           | Western blot/ChIP  | 1:1,000         |
| NFIB              | Sigma-Aldrich                | HPA003956          | IHC staining       | 1:500           |
| ITGA6             | Cell Signaling<br>Technology | 37500              | Western blot       | 1:1,000         |
| ITGA6             | Abcam                        | ab181551           | IHC staining       | 1:500           |
| CD44              | Cell Signaling<br>Technology | 3570               | Western blot       | 1:1,000         |
| CD44              | Abcam                        | ab157107           | IHC staining       | 1:2,000         |
| CD44              | BioLegend                    | 103011             | IF                 | 1:100           |
| EGFR              | Cell Signaling<br>Technology | 4267               | Western blot       | 1:1,000         |
| EGFR              | Cell Signaling<br>Technology | 4267               | IF                 | 1:50            |
| p-EGFR            | Cell Signaling<br>Technology | 3777               | Western blot       | 1:1,000         |
| AKT               | Cell Signaling<br>Technology | 4691               | Western blot       | 1:1,000         |
| p-AKT             | Cell Signaling<br>Technology | 4060               | Western blot       | 1:1,000         |
| ERK1/2            | Cell Signaling<br>Technology | 4695               | Western blot       | 1:1,000         |
| p-ERK1/2          | Cell Signaling<br>Technology | 4370               | Western blot       | 1:1,000         |
| Ki-67             | Cell Signaling<br>Technology | 9449               | IHC staining       | 1:800           |
| Cleaved Caspase-3 | Cell Signaling<br>Technology | 9664               | IHC staining       | 1:400           |

**Supplementary Table 6 The relationship of clinicopathological factors and the miR-302a, NFIB, CD44 and ITGA6 expression in the tissue microarray**

|                        | All cases | miR-302a |      |          | NFIB |    |    |     |          | CD44 |    |    |     |          | ITGA6 |    |    |     |          |
|------------------------|-----------|----------|------|----------|------|----|----|-----|----------|------|----|----|-----|----------|-------|----|----|-----|----------|
|                        |           | Low      | High | <i>P</i> | -    | +  | ++ | +++ | <i>P</i> | -    | +  | ++ | +++ | <i>P</i> | -     | +  | ++ | +++ | <i>P</i> |
| <b>Gender</b>          |           |          |      | 0.6726   |      |    |    |     | 0.4947   |      |    |    |     | 0.8782   |       |    |    |     | 0.7274   |
| Female                 | 45        | 23       | 22   |          | 0    | 17 | 16 | 12  |          | 1    | 21 | 10 | 13  |          | 1     | 20 | 12 | 12  |          |
| Male                   | 45        | 25       | 20   |          | 1    | 22 | 12 | 10  |          | 4    | 21 | 11 | 9   |          | 2     | 24 | 10 | 9   |          |
| <b>Age (years)</b>     |           |          |      | 0.4785   |      |    |    |     | 0.5089   |      |    |    |     | 0.5507   |       |    |    |     | 0.6268   |
| ≤65                    | 40        | 23       | 17   |          | 0    | 15 | 15 | 10  |          | 3    | 16 | 9  | 12  |          | 2     | 17 | 10 | 11  |          |
| >65                    | 50        | 25       | 25   |          | 1    | 24 | 13 | 12  |          | 2    | 26 | 12 | 10  |          | 1     | 27 | 12 | 10  |          |
| <b>Tumor size (cm)</b> |           |          |      | 0.0028   |      |    |    |     | 0.0659   |      |    |    |     | 0.0336   |       |    |    |     | 0.032    |
| ≤5                     | 56        | 23       | 33   |          | 1    | 28 | 16 | 11  |          | 4    | 28 | 15 | 9   |          | 2     | 34 | 10 | 10  |          |
| >5                     | 34        | 25       | 9    |          | 0    | 8  | 15 | 11  |          | 1    | 12 | 6  | 15  |          | 1     | 10 | 12 | 11  |          |
| <b>Differentiation</b> |           |          |      | 0.0068   |      |    |    |     | 0.0009   |      |    |    |     | 0.0018   |       |    |    |     | 0.0059   |
| High                   | 12        | 4        | 8    |          | 0    | 9  | 1  | 2   |          | 0    | 10 | 2  | 0   |          | 1     | 7  | 3  | 1   |          |
| Moderate               | 69        | 35       | 34   |          | 1    | 27 | 28 | 13  |          | 5    | 29 | 18 | 17  |          | 2     | 36 | 18 | 13  |          |
| Poor                   | 9         | 9        | 0    |          | 0    | 0  | 2  | 7   |          | 0    | 1  | 1  | 7   |          | 0     | 1  | 1  | 7   |          |
| <b>TNM stage</b>       |           |          |      | 0.0446   |      |    |    |     | 0.0005   |      |    |    |     | 0.0341   |       |    |    |     | 0.0221   |
| I                      | 6         | 2        | 4    |          | 0    | 4  | 2  | 0   |          | 1    | 3  | 1  | 1   |          | 0     | 2  | 4  | 0   |          |
| II                     | 49        | 21       | 28   |          | 0    | 27 | 5  | 11  |          | 3    | 29 | 9  | 8   |          | 2     | 31 | 9  | 7   |          |
| III                    | 34        | 24       | 10   |          | 1    | 5  | 17 | 11  |          | 1    | 8  | 10 | 15  |          | 1     | 11 | 9  | 13  |          |
| IV                     | 1         | 1        | 0    |          | 0    | 0  | 1  | 0   |          | 0    | 0  | 1  | 0   |          | 0     | 0  | 0  | 1   |          |
